# Supplementary material
Source: publisher site journal article supplement (http://www.spandidos-publications.com/1674/downloadSupplementary)
Supplement: Supplementary file 1 [file downloadSupplementary]

## Sheet: 工作表1
Data S1
number	gender	sge	smoking history	KPS score	Bone metastasis	Brain metastasis	Liver metastasis	die	stage	GEFR	T790M	PFS（months）	complex-mutations	Evaluation
1	2	51	0	70	1	1	0	1	IV	4	4	1	ALK（+）	PD
2	2	62	0	90	1	0	0	0	IV	4	1	28.43		PR
3	2	66	0	90	0	0	1	0	IV	4	2	1.03		SD
4	2	67	0	90	1	1	0	0	IV	4	3	12.17		PR
5	1	59	0	70	1	1	0	0	IV	4	3	1.17	MET（+）	PD
6	1	75	1	90	0	0	0	0	IV	4	4	11.17		PR
7	2	65	0	90	0	0	0	0	IV	4	4	11.6		PR
8	1	68	0	90	1	0	0	0	IV	4	4	28.27		PR
9	2	39	0	90	1	0	1	0	IV	4	2	10.83	ALK（+）	PR
10	1	59	0	70	1	0	0	1	IV	1	4	2.2		PR
11	1	54	1	80	0	0	0	1	IV	4	3	0.5	BRAF、TP53	PD
12	1	59	1	90	1	1	0	0	IV	4	3	7.13	ERCC1	SD
13	2	49	0	90	0	0	0	0	IV	2	2	20.97		PR
14	2	53	0	90	0	0	0	0	IV	2	2	6.7		PR
15	2	28	0	90	0	0	1	0	IV	2	3	1	TP53（+）	PD
16	2	52	0	90	0	0	0	0	IV	1	1	7.13		SD
17	1	51	0	90	1	1	0	0	IV	2	4	17.23		PR
18	1	46	1	90	0	0	0	0	IV	2	2	13.93		PR
19	1	65	1	90	1	0	0	0	IV	2	2	15.27	TP53（+）、ERBB4（+）	SD
20	1	46	1	90	1	1	0	0	IV	2	3	15.1	SCLC trasformation	SD
21	1	67	1	90	0	0	0	0	IV	2	3	19.77		PR
22	1	55	1	80	0	1	0	0	IV	2	4	18.63		PR
23	1	67	1	90	0	0	0	0	IV	2	2	7.13		PR
24	1	50	1	70	1	1	1	1	IV	2	3	1.13		PD
25	1	42	1	70	0	0	0	0	IV	2	4	3.2		SD
26	1	48	1	70	1	1	0	0	IV	2	2	2.97		PR
27	1	52	1	90	0	0	0	0	IV	2	3	1		PD
28	1	61	0	90	0	0	0	0	IV	2	2	2.57		PD
29	1	54	0	90	0	0	0	0	IV	2	2	21.27		PR
30	2	37	0	90	0	1	0	0	IV	2	2	29.43		PR
31	2	62	0	90	0	1	0	0	IV	2	3	13.2		PR
32	2	60	0	90	0	0	0	0	IV	2	4	16.5		PR
33	2	42	1	80	0	0	0	0	IV	2	1	15.13		PR
34	2	77	0	90	0	0	1	1	IV	2	4	11.13		PR
35	2	47	0	70	0	0	0	0	IV	2	4	11.57		PR
36	2	70	0	50	1	1	0	0	IV	2	3	6.63	MET（+）	SD
37	2	48	0	90	1	0	0	0	IV	2	4	9.1		SD
38	2	51	0	90	1	0	0	0	IV	2	2	10.1	ALK（+）	PR
39	2	57	0	70	0	0	0	0	IV	2	4	29.43		PR
40	2	47	0	70	0	1	0	0	IV	2	3	7		PR
41	2	63	0	90	0	0	0	0	IV	2	2	37.03		PR
42	2	63	0	90	0	0	0	0	IV	2	2	11.17	C797S（+）	PR
43	2	30	0	90	1	0	0	0	IV	2	2	14.2	C797S（+）	PR
44	2	50	0	90	0	0	0	0	IV	2	2	20.23		PR
45	2	68	0	90	1	0	0	0	IV	2	2	21.53		PR
46	2	36	0	90	1	0	0	0	IV	2	2	25.37		PR
47	2	45	0	90	1	0	0	0	IV	2	4	26.37		PR
48	1	34	1	90	1	1	1	1	IV	2	2	16.33		PR
49	2	40	0	90	1	0	0	0	IV	2	2	20.33		PR
50	2	51	1	90	0	1	0	0	IV	2	3	13.17	SCLC trasformation	PR
51	1	63	0	90	1	0	0	1	IV	2	3	8.1		PR
52	1	44	0	60	1	0	0	1	IV	2	3	6.17	TP53（+）	SD
53	1	66	1	90	0	0	0	0	IV	2	2	15.37	C797S（+）	SD
54	2	64	0	90	0	1	0	1	IV	2	1	3.37	HER2(20)、TP53	PD
55	2	42	0	90	1	1	1	1	IV	2	2	7.17		PR
56	2	64	0	90	0	0	0	0	IV	2	1	25.67		PR
57	1	46	0	70	1	0	0	1	IV	2	4	0.17		PD
58	1	51	1	70	0	0	1	1	cT1bN3M0 IIIB	2	4	7.3		SD
59	1	47	0	90	0	0	0	0	IV	2	2	8.23	MET（+）、MYC amplification、TP53+	PR
60	2	50	0	90	0	0	0	0	IV	2	4	12.43	EGFR amplification、TP53+	PR
61	1	78	1	90	0	0	0	1	IV	3	2	2.03		PD
62	1	53	0	70	0	1	0	0	IV	3	2	13.7		PR
63	1	67	0	70	0	1	0	1	IV	3	3	36.57		PR
64	1	53	0	90	0	0	0	0	T1N3M0 IIIB	3	4	11.5		PR
65	1	42	0	90	0	1	0	0	IV	3	4	12.2		PR
66	1	52	0	90	1	0	0	0	IV	3	2	15.57		PR
67	1	62	0	90	0	0	0	0	IV	3	2	20.13		PR
68	1	60	1	90	1	1	0	0	IV	3	2	19.3		PR
69	2	76	0	70	0	0	0	1	IV	3	4	6.5		PR
70	2	57	0	90	0	0	0	0	IV	3	4	5.03		PR
71	2	46	0	90	0	0	0	0	T4N2M0 IIIB	3	4	19.17		PR
72	2	55	0	90	0	0	0	0	IV	3	3	33.47		PR
73	2	36	0	90	0	0	0	1	IV	3	4	1.03		PD
74	2	69	0	60	0	1	1	1	IV	3	2	16.3		SD
75	2	51	0	70	1	0	0	0	IV	3	4	5.13		SD
76	2	61	0	70	1	1	0	0	IV	3	3	11.73		PR
77	2	55	0	70	1	1	0	0	IV	3	2	16.67		PR
78	2	61	0	50	1	0	0	1	IV	3	3	16.37		PR
79	2	80	0	90	1	0	0	0	IV	3	2	23.63		PR
80	2	57	0	90	1	1	0	0	IV	3	4	29.47		PR
81	2	62	0	90	1	1	0	0	IV	3	4	10.13		PR
82	2	70	0	90	0	0	0	0	IV	3	2	4.2		PR
83	2	63	0	90	0	0	0	0	IV	3	2	22.3		PR
84	2	63	0	90	1	0	0	0	IV	3	3	1.93	TP53（+）	PD
85	2	66	0	90	1	0	0	0	IV	3	2	2.07		PD
86	2	71	0	90	0	0	0	1	IV	3	4	27.53		PR
87	2	68	0	90	1	0	0	0	IV	3	2	12.17		PR
88	1	62	0	90	0	1	0	1	IV	3	3	1.03		PD
89	2	70	0	90	1	1	1	0	IV	3	2	21.57		PR
90	2	69	0	90	0	0	0	0	IV	3	3	27.4		PR
91	2	59	0	90	1	0	0	0	IV	3	3	18.3		PR
92	2	54	0	90	1	0	0	0	IV	3	3	5.1	TP53（+）	SD
93	2	48	0	90	0	1	0	0	IV	3	1	21.23		PR
94	1	63	0	90	0	1	0	0	IV	3	2	38.57		PR
95	1	60	1	90	1	0	0	1	IV	3	2	4.07	KRAS（+）	SD
96	1	66	1	90	0	0	0	0	IV	3	4	14.2		PR
97	1	74	1	90	1	0	0	0	IV	3	3	6.4		PR
98	1	63	1	80	1	1	0	1	IV	3	2	7.03		SD
99	2	72	0	90	0	0	0	0	IV	3	2	8.97	BCL2L11（+）	PR
100	2	60	0	90	1	1	0	0	IV	3	3	21.3		PR
101	2	47	0	80	1	1	0	1	IV	3	2	5.03		SD
102	2	51	0	60	1	1	0	1	IV	3	4	9.03		SD
103	2	52	0	80	1	1	0	0	IV	3	4	5.87		SD
104	2	55	0	90	1	0	0	0	IV	3	1	18.23		PR
105	2	64	0	90	1	0	0	0	IV	3	2	18.63		PR
106	2	43	0	70	0	0	0	1	IV	3	3	0.4	KRAS（+）、TP53	PD
107	2	67	0	90	1	1	0	0	IV	3	4	6.6		SD
108	1	45	1	20	1	1	0	1	IV	3	4	5.37	EGFR amplification	SD
109	1	52	1	90	0	0	0	1	IV	3	1	0.83	TP53（+）	PD
110	1	52	1	90	0	1	0	1	IV	3	2	1	21P848L	PD
111	2	41	0	90	0	0	0	0	IV	3	2	20.13		PR
112	2	60	0	80	1	0	0	0	IV	3	4	0.87	MET（+）	PD
113	1	53	0	40	1	0	0	0	IV	3	3	3.47		PD
114	2	53	0	70	0	1	0	1	IV	3	4	6.5		SD
115	1	62	1	90	0	0	0	0	IV	3	3	1		PD
116	2	48	0	70	1	1	0	1	IV	3	4	1.73		PD
117	2	68	0	90	1	1	0	0	IV	3	2	14.63	L861Q	PR
118	1	57	0	70	0	1	0	0	IV	5	4	5.83		SD
119	1	60	1	90	1	0	0	1	IV	4	4	0.77		PD
120	2	90	0	50	0	0	0	0	IV	5	4	0.47		PD
121	2	54	0	90	1	1	1	1	IV	2	4	1.03		PD
122	2	72	0	90	0	0	0	0	IV	5	4	12.17	RET	PR
123	1	49	0	70	1	1	0	0	IV	5	4	26.53		PR
124	2	48	0	90	0	0	0	0	IV	5	4	15.23		PR
125	2	63	0	90	1	0	0	0	IV	5	4	12.17		PR
126	1	83	1	50	0	0	0	1	IV	5	2	7.13		SD
127	2	59	0	70	0	0	0	1	IV	5	4	6.23		SD
128	2	66	0	90	0	0	0	1	IV	5	4	7.07		SD
